# Supplementary material for: Anisotropic energy transfer in a clay–porphyrin layered system with environment-responsiveness
Source: Royal Society of Chemistry journal article supplement (doi:10.1039/d0cp02263b), 2020-01-01
Supplement: d0cp02263b1.pdf [file d0cp02263b1.pdf]

## Supporting Information

### **Anisotropic energy transfer in the clay-porphyrin layered system with environment-responsiveness**

*Haruka Nishina,<sup>1</sup> Shota Hoshino,<sup>1</sup> Yuta Ohtani,<sup>2</sup> Tamao Ishida,<sup>1,3,4</sup> Tetsuya Shimada,<sup>1</sup> Shinsuke Takagi<sup>1,3\*</sup>*

<sup>1</sup> Department of Applied Chemistry, Graduate School of Urban Environmental Sciences, Tokyo Metropolitan University, 1-1 Minami-ohsawa, Hachioji, Tokyo 192-0397, Japan.

<sup>2</sup> Department of Applied Chemistry, Sanyo-Onoda City University, 1-1-1 Daigaku-dori, Sanyo-Onoda, Yamaguchi, 756-0884, Japan

<sup>3</sup> Research Center for Hydrogen Energy-based Society (ReHES), Tokyo Metropolitan University, 1-1 Minami-ohsawa, Hachioji, Tokyo 192-0397, Japan.

<sup>4</sup> Research Center for Gold Chemistry, Tokyo Metropolitan University, 1-1 Minami-ohsawa, Hachioji, Tokyo 192-0397, Japan.

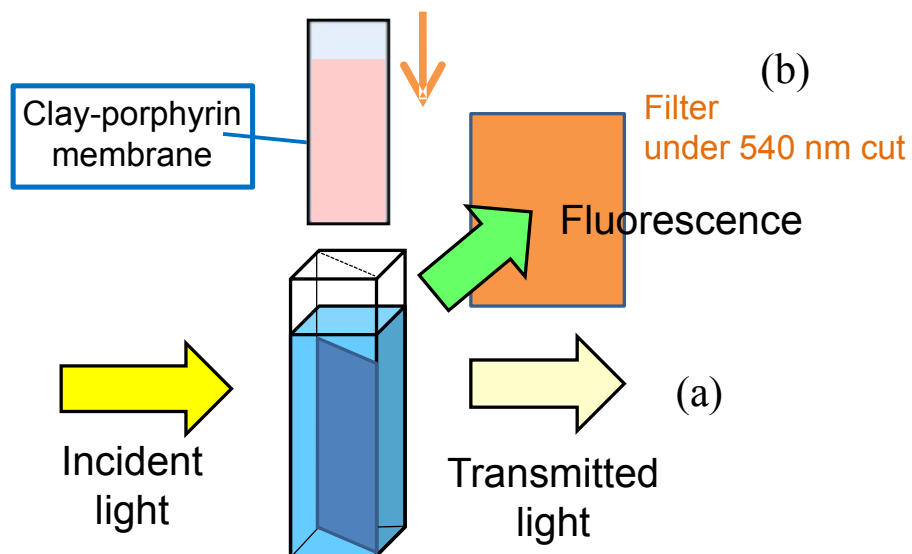

Fig. S1. Setup for measuring absorption spectra and fluorescence spectra of *m*-TMPyP and *p*-TMPyP on the clay monolayer and in the laminated system. (a) For absorption measurements. (b) For fluorescence measurements.

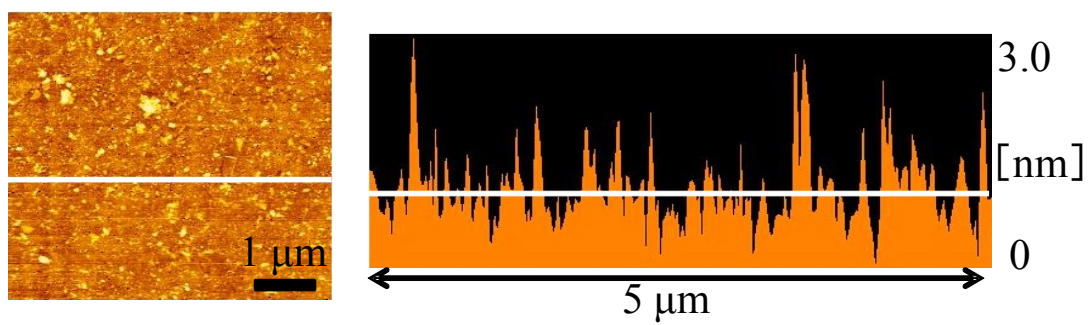

Fig. S2. AFM image of LB membrane composed of SSA on a glass plate.

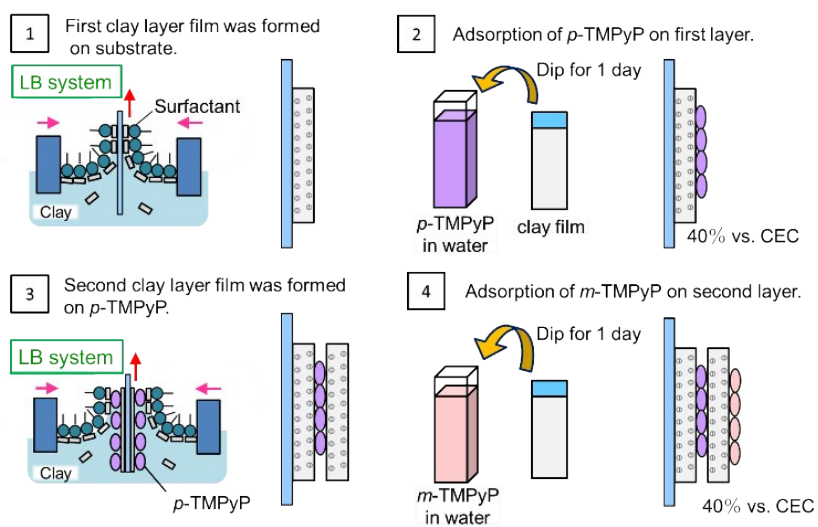

Fig. S3. LB technique to construct laminated system composed of clay sheets, *m*-TMPyP and *p*-TMPyP.

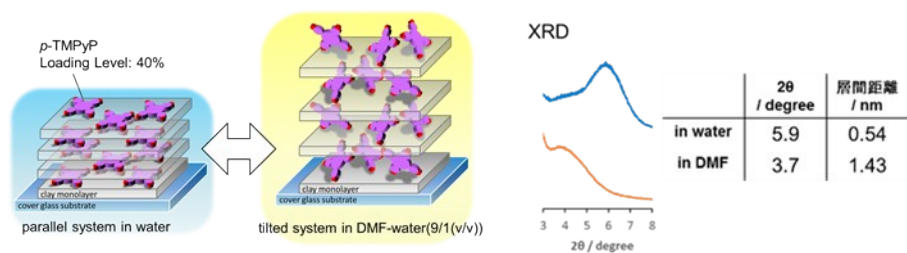

Fig. S4. The interlayer distance of the clay-*p*-TMPyP laminated system (4 layers) in water and DMF-water (9/1(v/v)) by XRD.

### Determination of $\eta_{ET}$

The luminescence quantum yield  $\phi_D$  and lifetime  $\tau_D$  of *m*-TMPyP as a donor were measured by *m*-TMPyP at a loading level of 1% on the clay monolayer. Using these values, the energy transfer efficiency  $\eta_{ET}$  was calculated.

$$F_{D+A} = \alpha F_D + \beta F_A \quad (1)$$

$$\alpha = 1 - \eta_{ET} - q_D \quad (2)$$

$$\beta = 1 + \frac{1 - 10^{A_D}}{1 - 10^{A_A}} \eta_{ET} \quad (3)$$

where,  $F$  is fluorescence spectra ( $D$ : an energy donor,  $A$ : an energy acceptor),  $A_D$  is absorbance of a donor at excitation wavelength,  $A_A$  is absorbance of an acceptor at excitation wavelength and these are used by Fitting. Then, the observed energy transfer efficiency ( $\eta_{ET}$ ) and loss efficiency ( $q_D$ ) is calculated.

Table S1. Energy Transfer Parameters in Water and DMF-Water (9/1(v/v))

|                           | $\alpha$ | $\beta$ | $\eta_{ET}^{observed}$ | $q_D$ |
|---------------------------|----------|---------|------------------------|-------|
| In water                  | 0.275    | 4.50    | 60%                    | 12%   |
| In DMF / water (9/1(v/v)) | 0.780    | 0.606   | 11%                    | 11%   |
